# Supplementary material
Source: publisher figshare collection journal article supplement (https://acs.figshare.com/ndownloader/files/4681453)
Supplement: Supplementary file 1 [file 4681453]

**Electronic supplementary information (ESI) in the  
manuscript**

**Magnetic Properties of Bulk BiCrO<sub>3</sub> Studied with *dc* and *ac*  
Magnetization and Specific Heat**

Alexei A. Belik,<sup>a,\*</sup> Naohito Tsujii,<sup>b</sup> Hiroyuki Suzuki,<sup>b</sup> and Eiji Takayama-Muromachi<sup>a</sup>  
*Advanced Nano Materials Laboratory (ANML) and Quantum Beam Center, National Institute  
for Materials Science (NIMS), 1-1 Namiki, Tsukuba, Ibaraki 305-0044, Japan*

\* Author to whom correspondence should be addressed.

Advanced Nano Materials Laboratory, National Institute for Materials Science, Namiki 1-1,  
Tsukuba, Ibaraki, 305-0044, Japan. E-mail: Alexei.BELIK@nims.go.jp

<sup>a</sup> ANML, NIMS

<sup>b</sup> Quantum Beam Center, NIMS

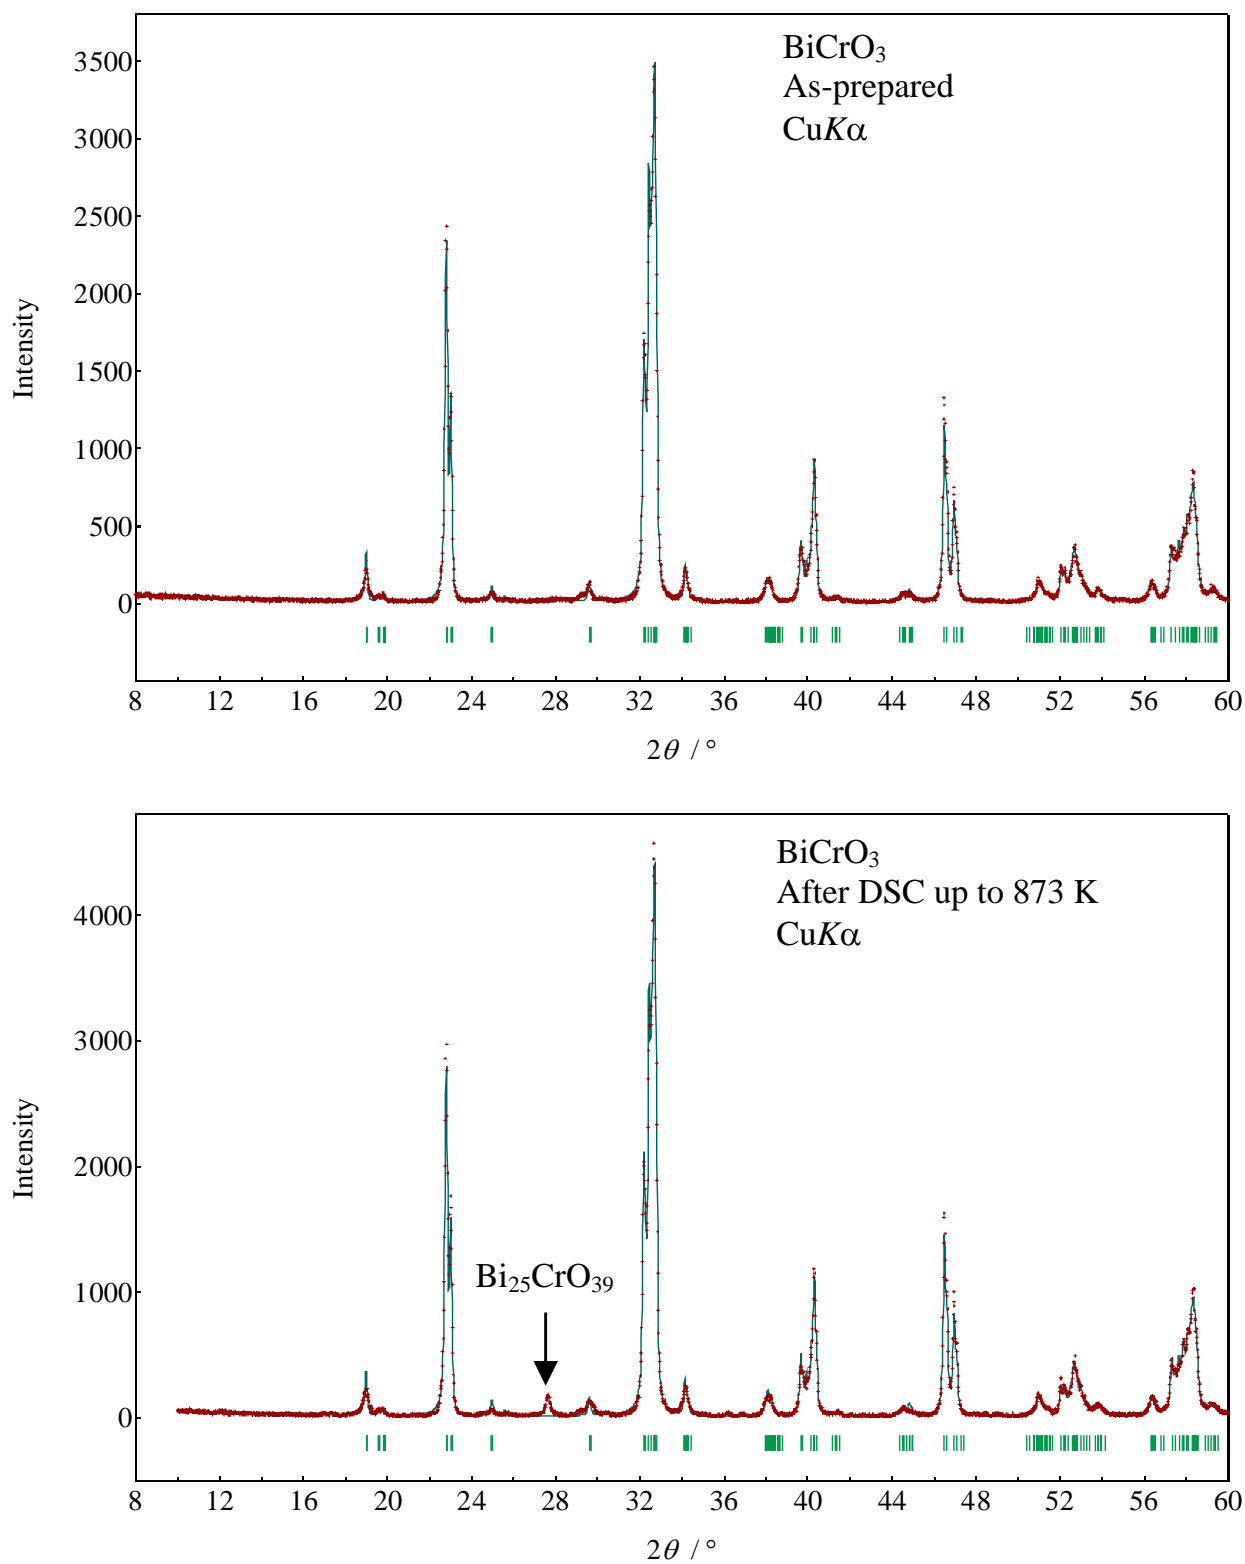

**Fig. S1.** XRD patterns of the as-prepared  $\text{BiCrO}_3$  and after the DSC experiment up to 873 K.

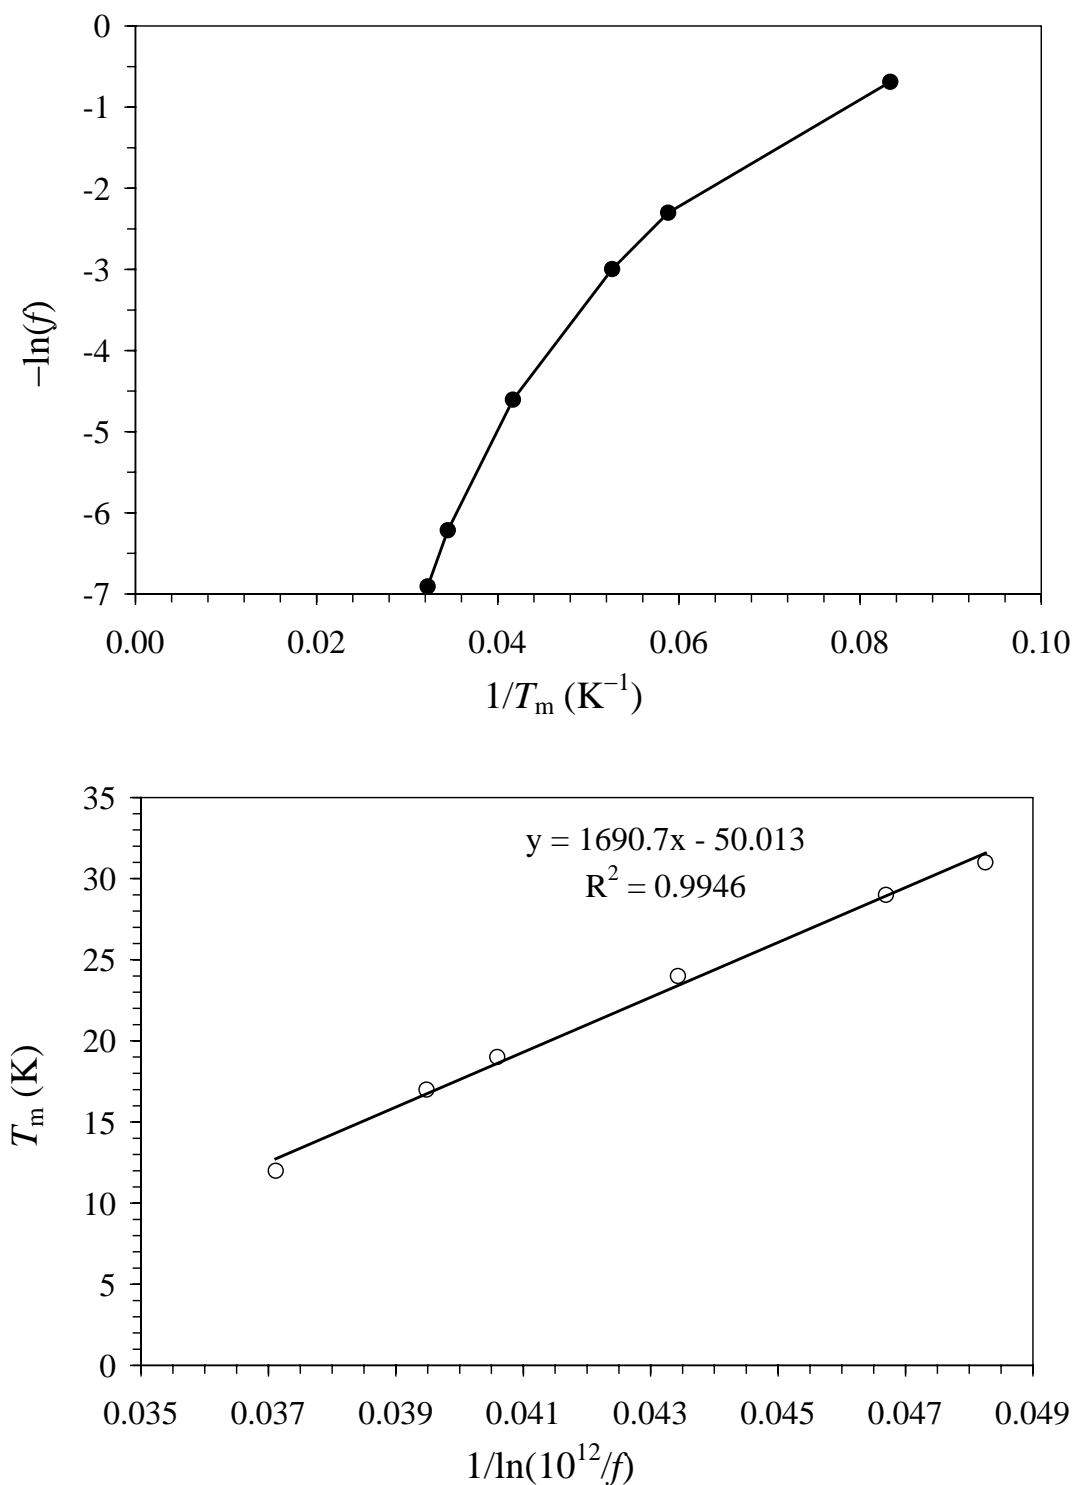

**Fig. S2.** The upper figure shows the  $-\ln(f)$  vs  $1/T_m$  curve (the thermal activated Arrhenius law), where  $T_m$  is the position of the maximum on the  $\chi''$  vs  $T$  curves at the given frequency  $f$ . The lower figure shows the  $T_m$  vs  $1/\ln(f_0/f)$  plot with  $f_0 = 10^{12}$  Hz (the Vogel-Fulcher law); the fitting parameters ( $E_a/k_B = 1690$  K and  $T_0 = -50$  K) are given on the figure.

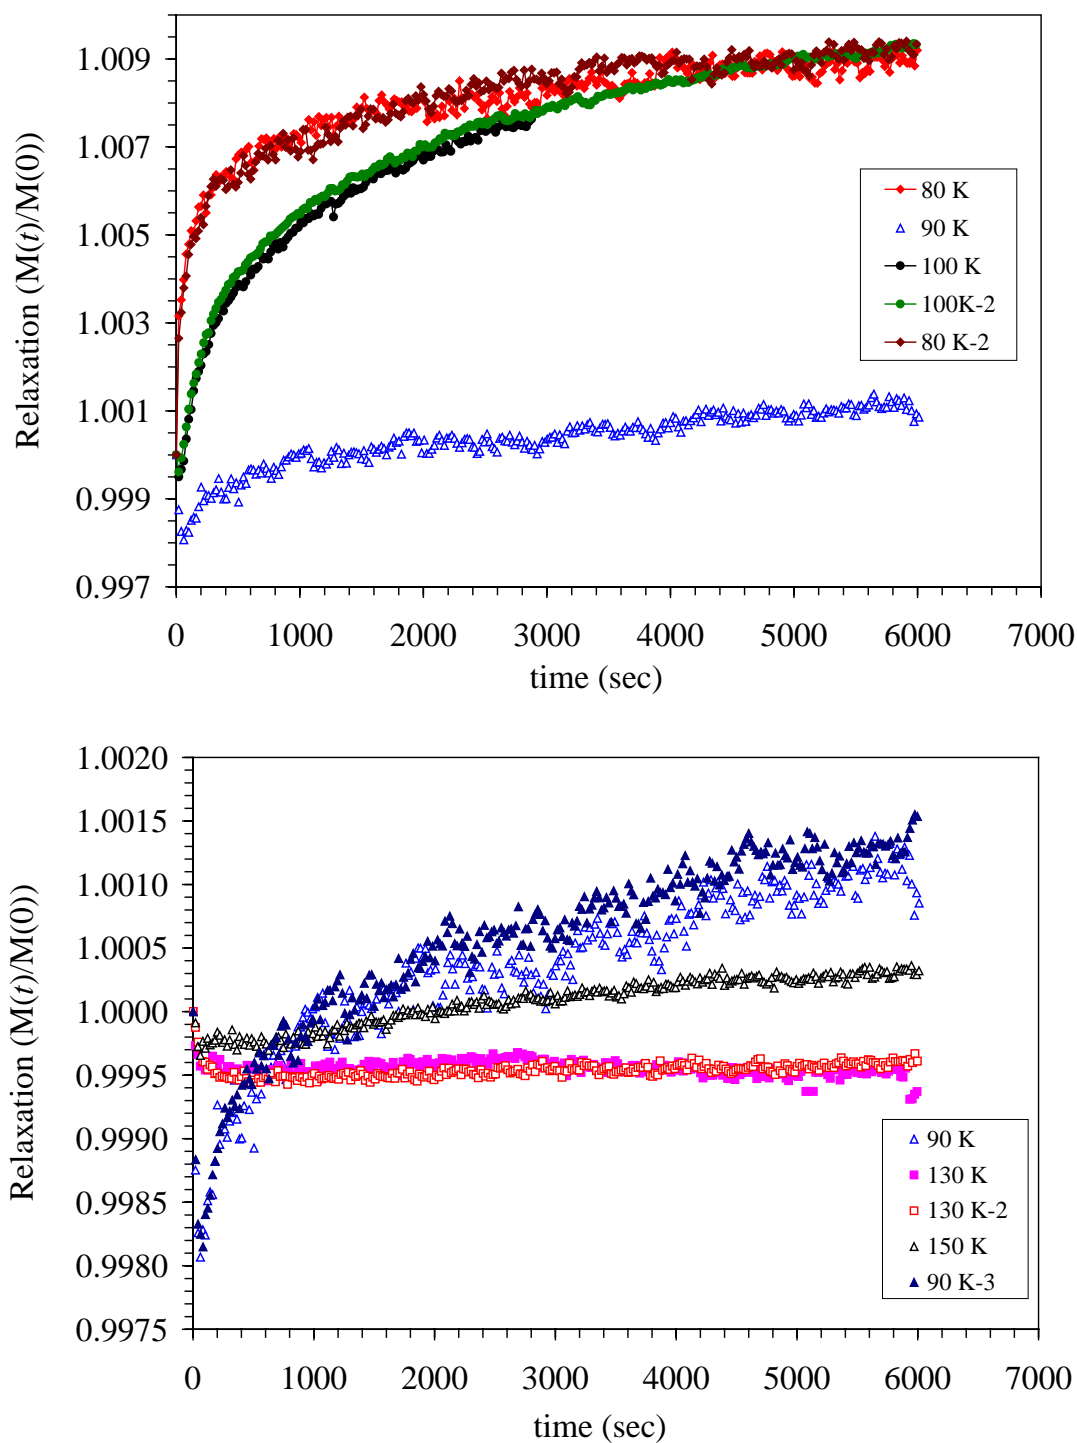

**Fig. S3a.** Reproducibility of the relaxation curves of BiCrO<sub>3</sub>. The time-dependent relaxation curves were measured at 100 Oe after cooling the sample from 200 K to the desired temperature at zero magnetic field (the waiting time before setting 100 Oe was 5 min).

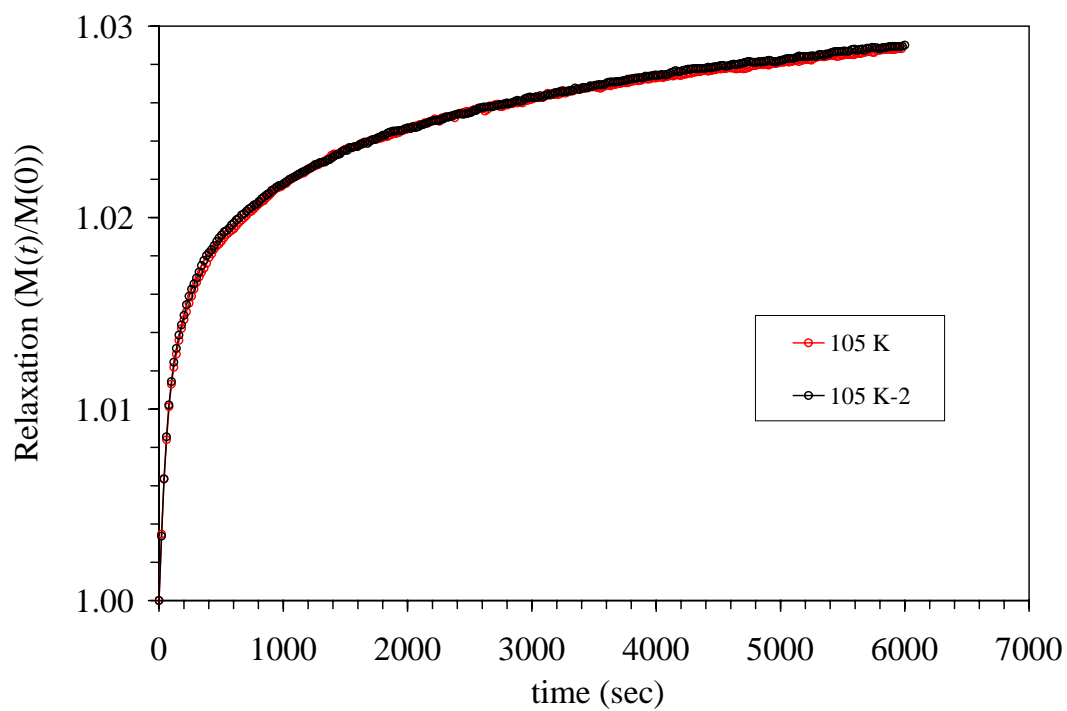

**Fig. S3b.** Reproducibility of the relaxation curves of  $\text{BiCrO}_3$ .

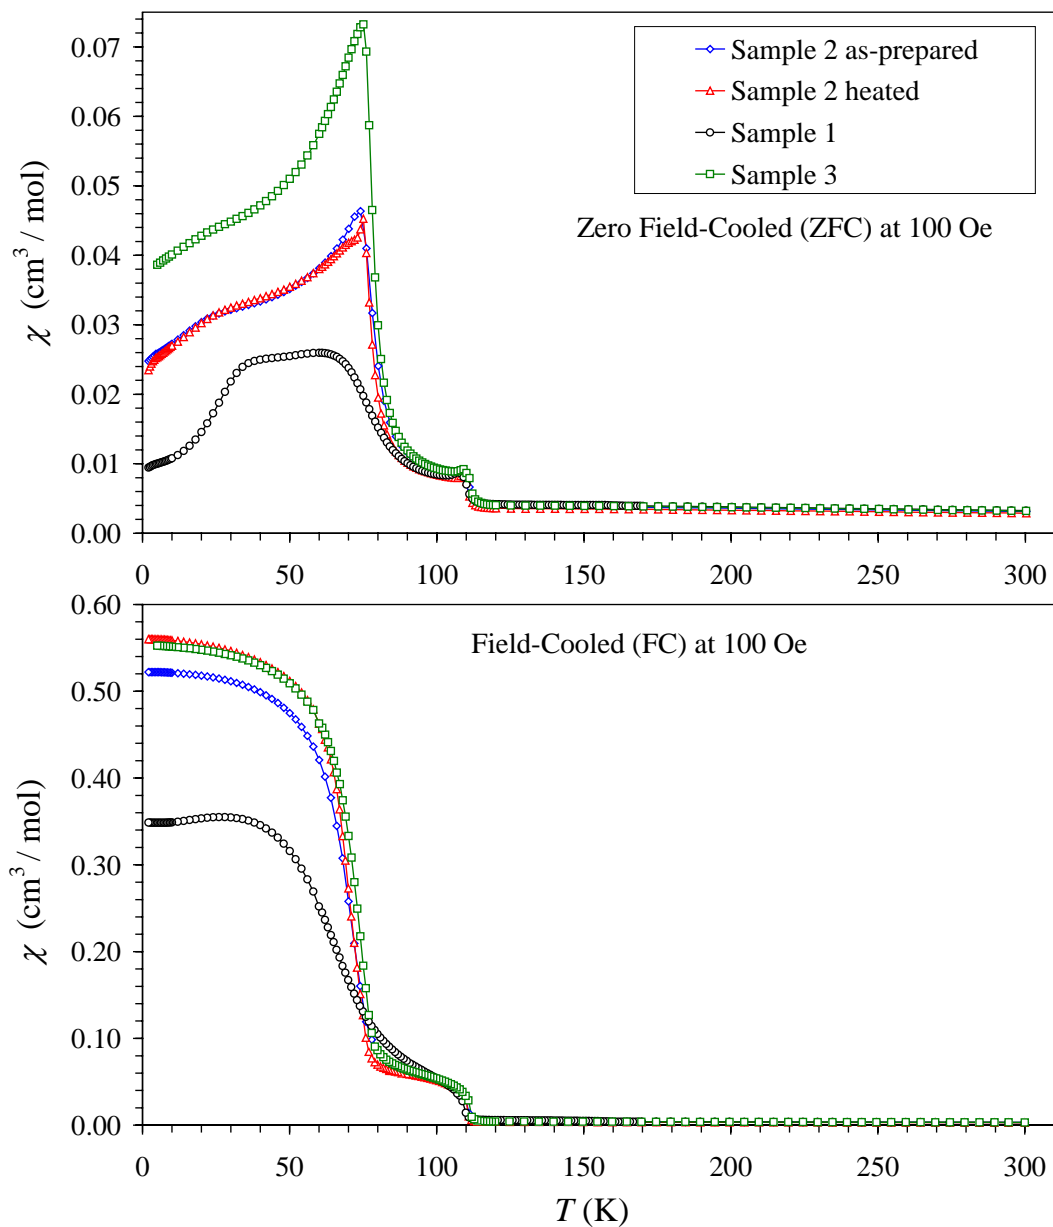

**Fig. S4a.** The ZFC and FC dc magnetic susceptibility ( $\chi = \mathbf{M}/\mathbf{H}$ ) curves of different  $\text{BiCrO}_3$  samples (sample 1 as-prepared, sample 3 as-prepared, sample 2 as-prepared, and sample 2 heated) measured at 100 Oe. The curves for the as-prepared sample 2 are shown, and also for sample 2 after heating in air at 550 K (2 h) and cooling to room temperature for 40 h (sample 2 heated).

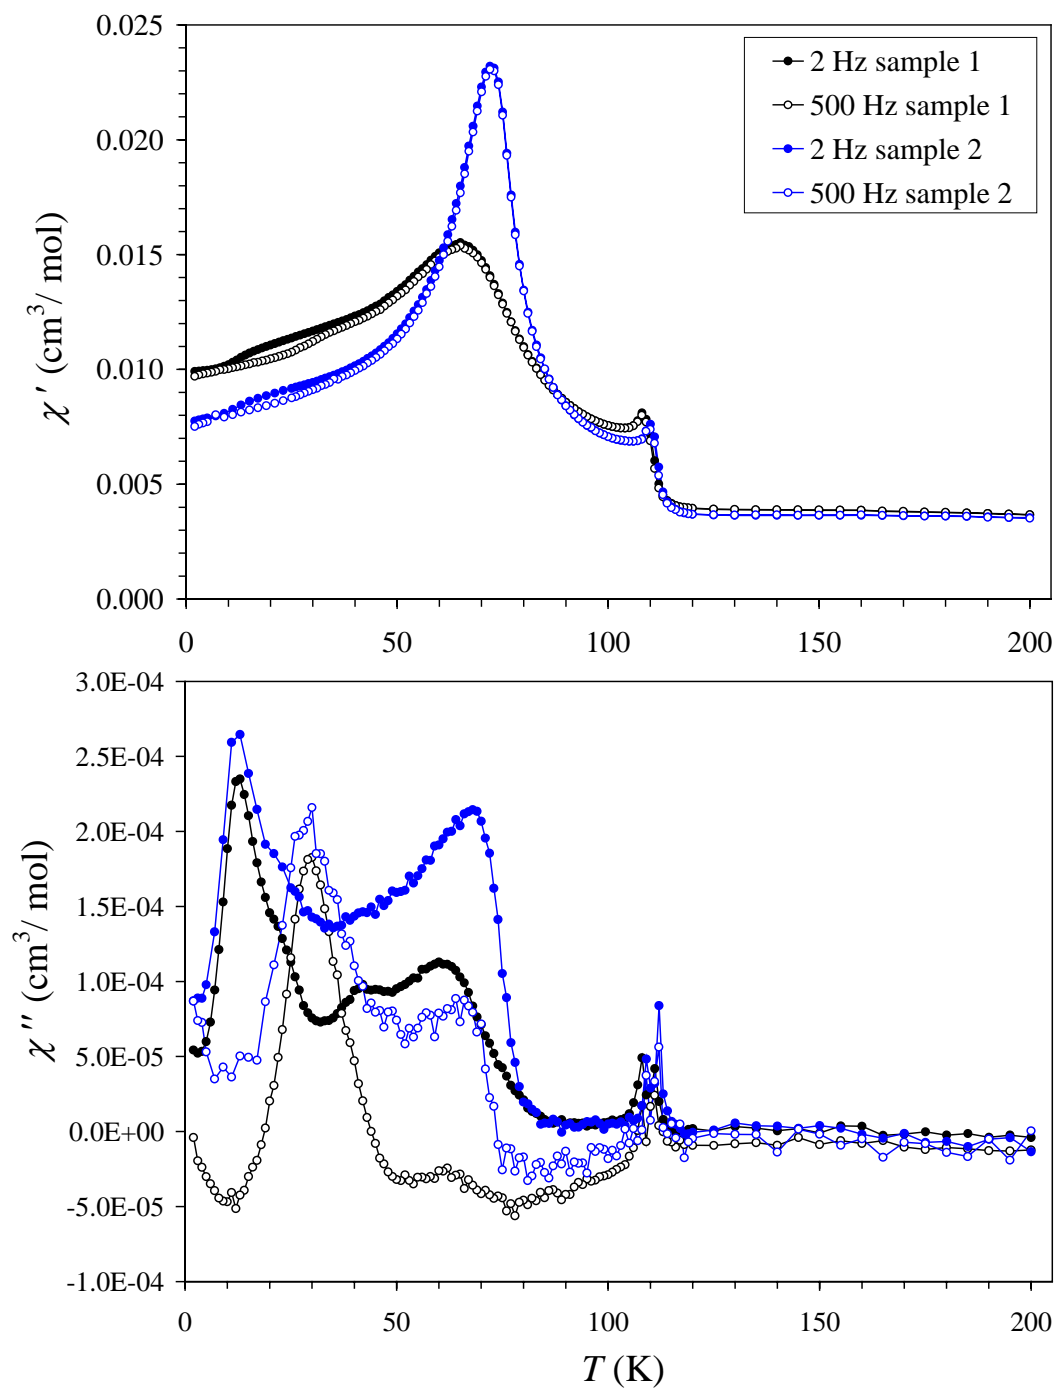

**Fig. S4b.** The real  $\chi'$  and imaginary  $\chi''$  parts of the ac susceptibilities of different  $\text{BiCrO}_3$  samples (sample 1 as-prepared and sample 2 as-prepared) as a function of temperature at frequencies  $f = 1.99$  and  $498.7$  Hz. Measurements were performed on cooling at zero static field using an ac field with the amplitude  $H_{ac} = 5$  Oe.

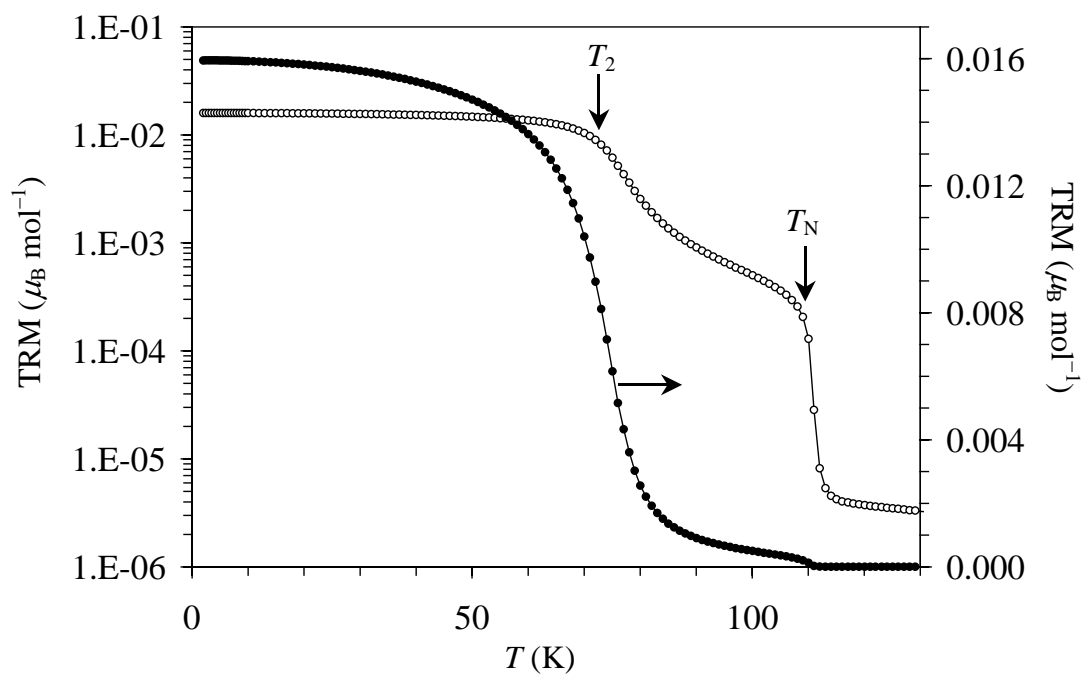

**Fig. S4c.** The thermoremanent magnetization (TRM) curve as a function of temperature for  $\text{BiCrO}_3$  (sample 2 as prepared). The TRM curve was measured at zero magnetic field on heating after cooling the sample from 270 K to 2 K at 1000 Oe. The same curve is given in the linear and logarithmic scales.



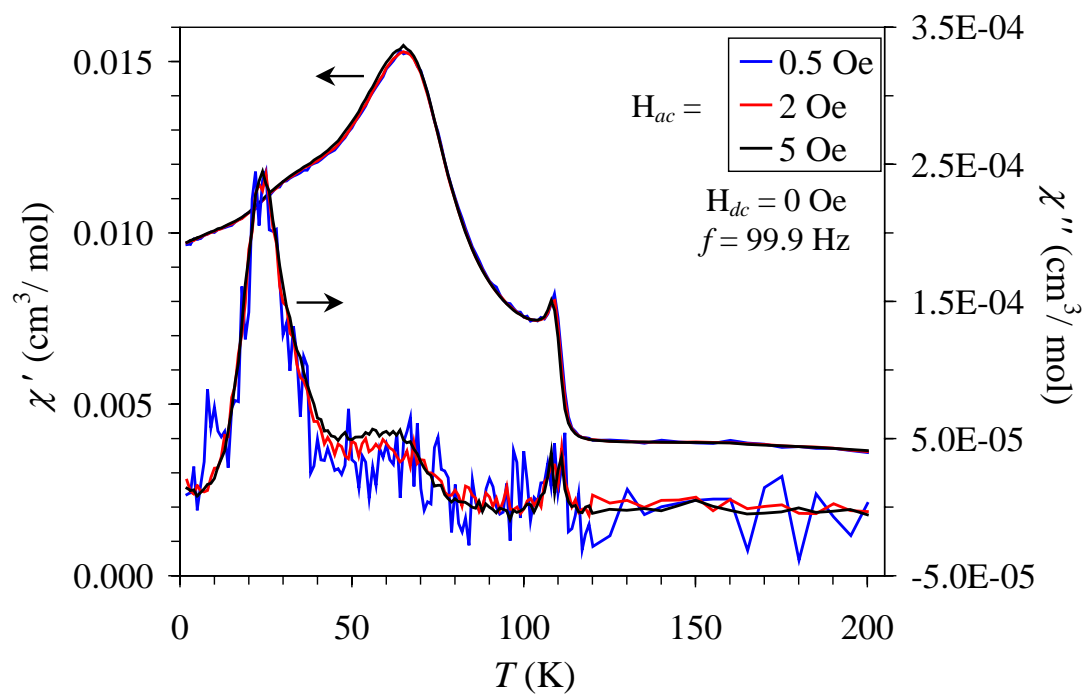

**Fig. S5.** The real  $\chi'$  and imaginary  $\chi''$  parts of the ac susceptibilities of  $\text{BiCrO}_3$  (sample 1 as-prepared) as a function of temperature at different  $H_{ac}$ . Measurements were performed on cooling at zero static field using  $f = 99.9$  Hz.
